# Supplementary material for: Transcriptome and Biochemical Analyses of a Chlorophyll-Deficient Bud Mutant of Tea Plant (Camellia sinensis)
Source: MDPI journal article supplement (doi:10.3390/ijms242015070), 2023-10-11
Supplement: s1 [file s1]

**Table S1.** Evaluation of transcriptome sequencing data.

| Groups | Total Reads | Clean Reads | Clean Bases | GC(%) | Q20(%) | Total Mapped Reads | Ratio(%) |
|--------|-------------|-------------|-------------|-------|--------|--------------------|----------|
| HY1    | 40836862    | 40471570    | 6.07G       | 43.86 | 97.26  | 35916783           | 88.75%   |
| HY2    | 48759820    | 48254254    | 7.24G       | 44.59 | 97.54  | 43399693           | 89.94%   |
| HY3    | 42106094    | 41559508    | 6.23G       | 44.51 | 97.58  | 37087698           | 89.24%   |
| LY1    | 42657798    | 42085398    | 6.31G       | 44.42 | 97.62  | 37286420           | 88.60%   |
| LY2    | 46700974    | 46025798    | 6.9G        | 44.35 | 97.71  | 40966016           | 89.01%   |
| LY3    | 46251124    | 45422760    | 6.81G       | 44.85 | 97.64  | 40707219           | 89.62%   |

**Table S2.** Primer information.

| Primer name | Sequence (5'-3')         |
|-------------|--------------------------|
| GAD-F       | TGAATGGAGGGTGGGTCTCA     |
| GAD-R       | CGGACGTATCGAGAAGCGAA     |
| ANS-F       | GATGACTACAGTGGCTGCCC     |
| ANS-R       | AAGTATGTTGCCGATCCCCG     |
| AAH-F       | CTCCATGACGACCCGAAACT     |
| AAH-R       | AAGTAATTGGCATCTTTCTGTCTG |
| TASG-F      | GGAGAGAGATGTGGTGCAGAC    |
| TASG-R      | ATGACTCCTGCAATGCCCTC     |
| DFR-F       | GGGATTTGTGTGCCGAAGC      |
| DFR-R       | TTGGGGTTCAAAGCTCCACA     |
| GDHA-F      | GAGTGAATCGTGTTCACGG      |
| GDHA-R      | ATTCTTCAGCGGCAAAAATGC    |
| CLH2-F      | TAGGCCATGCCAAAACCCAA     |
| CLH2-R      | GAATGAGGGACATAGGTGAGGA   |
| SGR-F       | TCTTCAAAGCCATCCCCACC     |
| SGR-R       | AGTGGGAGAGGGTGTAGGTC     |
| GS2-F       | CTGGAACGGTGCAGGATGC      |
| GS2-R       | GCCCCACGCGGATTGAACA      |
| CAO-F       | GCAGACACTCAACAGCTCCT     |
| CAO-R       | GCATTGTCGGGTAGGTTCCA     |
| POR-F       | ATGGTGCCAAGGCCTACAAA     |
| POR-R       | AGCTTGGCTCACTTACCACC     |
| GUN4-F      | CAGCACAGAAGAGGGGCTAT     |
| GUN4-R      | CCCTCAGGTGTGTCATCACT     |
| CHLH-F      | CACCCTTTGGCCCCATGTAT     |
| CHLH-R      | CTCAACTGGCCCCGAGAAAT     |
| CHLI-F      | AGGGCAGAGTTATGGGAGGA     |
| CHLI-R      | CTGTTCTTGGGCAGGACTGA     |
| CHLD-F      | CGTTGTCGGACAGGATGCTA     |
| CHLD-R      | CATCTTCCCACTCTCCGGG      |
| Actin-F     | GCCATATTTGATTGGAATGG     |
| Actin-R     | GGTGCCACAACCTTGATCTT     |

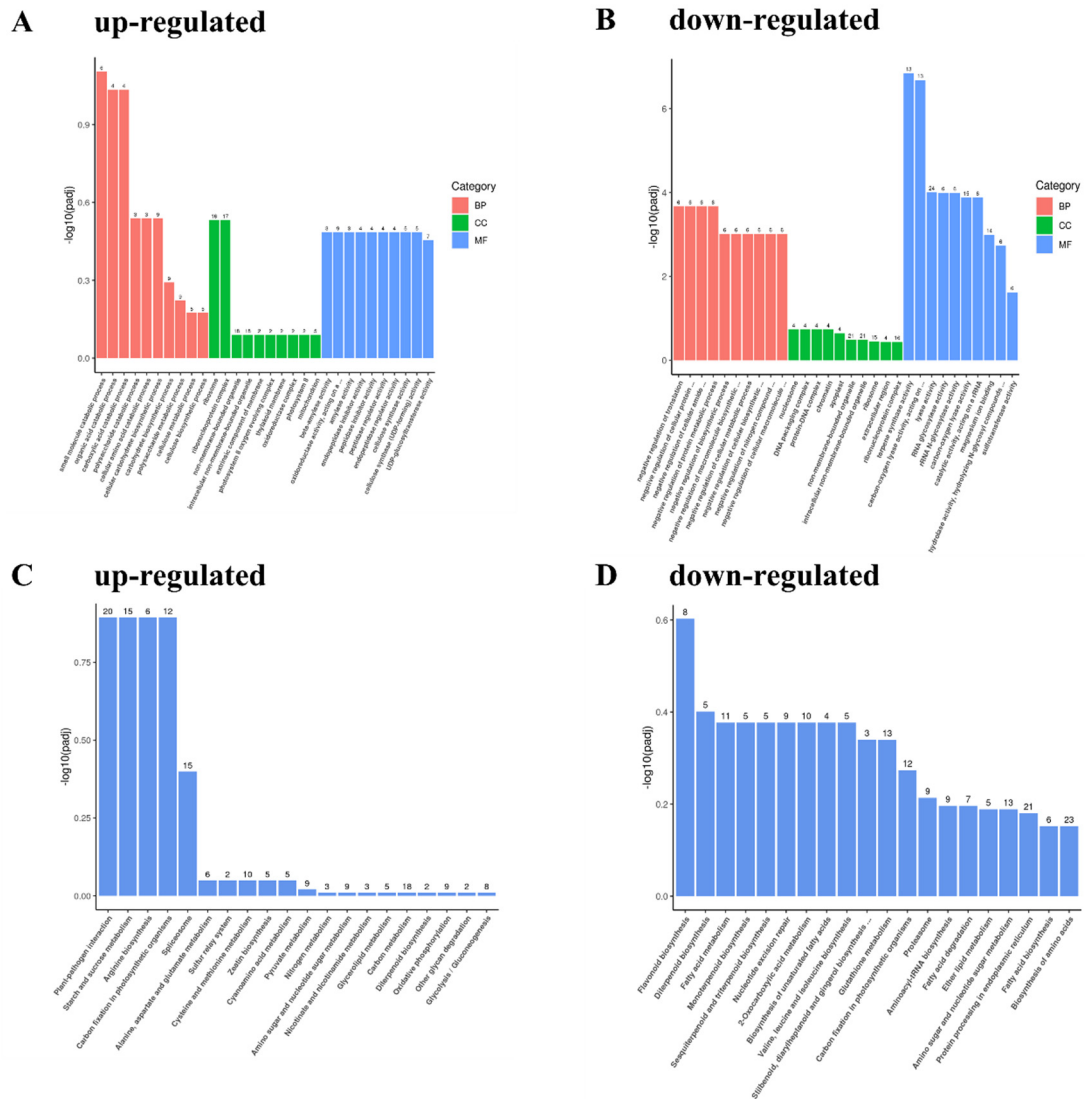

**Figure S1.** GO and KEGG enrichment analysis of DEGs between HY and LY. (A)-(B) Bar graph showing the top 30 enriched GO classifications of up- and down-regulated DEGs in three (BP, CC, MF) categories. BP, biological process; CC, cellular component; MF, molecular function; (C)-(D) Bar graph showing the top 20 enriched pathways of up- and down-regulated DEGs in KEGG analysis.

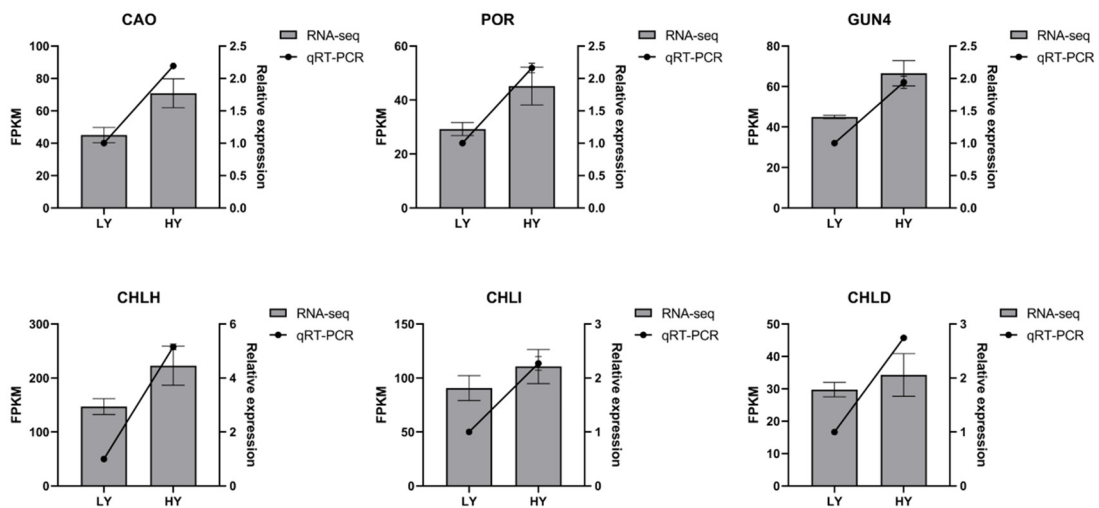

**Figure S2.** qRT-PCR validation of the six candidate DEGs related to chlorophyll biosynthesis. CAO, Chlorophyllide a oxygenase; POR, NADPH-protochlorophyllide oxidoreductase; GUN4, Genomes uncoupled 4; CHLH, Mg chelatase H subunit; CHLI, Mg chelatase I subunit ; CHLD, Mg chelatase D subunit.

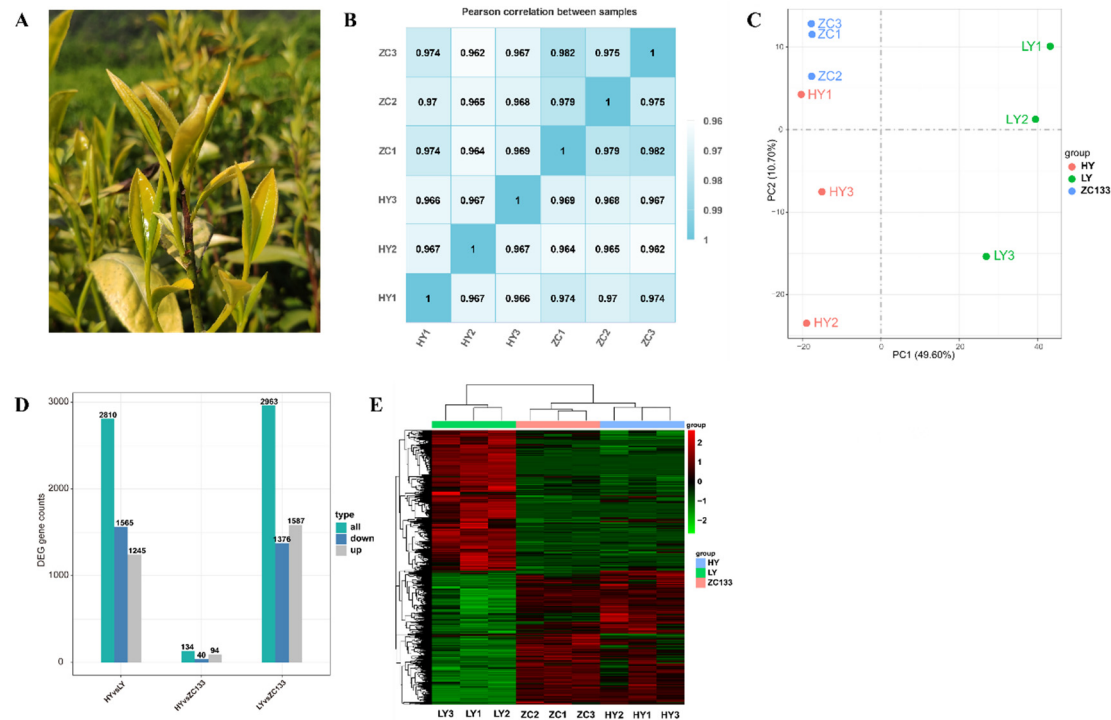

**Figure S3.** (A) Plant phenotype of 'Zhongcha 133' (captured on 11 April 2022); (B) Heatmap showing Pearson correlate coefficients of gene expression among different samples pairwise; (C) Principal component analysis (PCA) of the sequencing samples based on gene expression levels using their FPKM values. (D) Bar graph showing the number of total, up- and down-regulated DEGs between pairwise samples in different comparisons; (E) Cluster heat map of DEGs. The FPKM values of each gene expression levels were normalized with Z-score method. The redder color represents the higher expression levels and greener color represents lower levels. ZC1, ZC133-1; ZC2, ZC133-2; ZC3, ZC133-3. All the analyses were based on three biological replicates within groups.
